# Supplementary material
Source: publisher figshare collection journal article supplement (https://karger.figshare.com/ndownloader/files/11122484)
Supplement: Supplementary file 1 [file 11122484]

**Table S1: Donor characteristics for the three islet transplantations**

| **Islet transplantation (IT)** | **Age** | **Gender** | **BMI** | **Cause of death** |
| --- | --- | --- | --- | --- |
| Lung, liver and 1st IT | 9 years | Female | 19.0kg/m2 | Meningitis |
| 2nd IT | 44 years | Female | 34.9kg/m2 | Cerebral hemorrhage |
| 3rd IT | 31 years | Female | 20.5kg/m2 | Cerebral hemorrhage |
